# Supplementary material
Source: PubMed Central journal article supplement (PMC8034106)
Supplement: 12911_2021_1478_MOESM1_ESM.pdf [file 12911_2021_1478_MOESM1_ESM.pdf]

## **A questionnaire to Investigate Physiotherapists' Perceptions of and Willingness to Use Telerehabilitation in Kuwait During the COVID-19 Pandemic**

### **Section 1: Socio-demographic data**

#### **1- Age:**

- less than 35 years old
- 35 - 50
- 51 - 60
- Above 60

#### **2- Gender:**

- Female
- Male

#### **3- Nationality**

- Kuwaiti
- Non-Kuwaiti

#### **4- Which hospital do you work?**

- General hospital
- Rehabilitation hospital
- Specialist hospital

#### **5- Years of experience:**

- 10 years (PT practitioner / senior PT practitioner)
- 11 - 20 years (PT specialist / senior PT specialist)
- 21years and above (Superintendent PT)

### **Section 2: Technological background information**

#### **6- Do you use a computer at work?**

- <sub>1</sub> Always    <sub>2</sub> Often    <sub>3</sub> Sometimes    <sub>4</sub> Rarely    <sub>5</sub> Never

#### **7- Do you use internet at work?**

- <sub>1</sub> Always    <sub>2</sub> Often    <sub>3</sub> Sometimes    <sub>4</sub> Rarely    <sub>5</sub> Never

#### **8- Do you use e-mail at work?**

- <sub>1</sub> Always    <sub>2</sub> Often    <sub>3</sub> Sometimes    <sub>4</sub> Rarely    <sub>5</sub> Never

#### **9- Do you used any of telerehabilitation techniques in your work place?**

- <sub>1</sub> Always    <sub>2</sub> Often    <sub>3</sub> Sometimes    <sub>4</sub> Rarely    <sub>5</sub> Never

### **Section 3: Perception about telerehabilitation system**

#### **10- Telerehabilitation system could be a solution for patients with physical problems during the pandemic.**

- <sub>1</sub> Strongly disagree    <sub>2</sub> Disagree    <sub>3</sub> Agree    <sub>4</sub> Strongly agree

**11- Telerehabilitation is a viable approach for providing medical care services to patients.**

<sub>1</sub> Strongly disagree   <sub>2</sub> Disagree   <sub>3</sub> Agree   <sub>4</sub> Strongly agree

**12- ICT/ the internet has a potential role in healthcare.**

<sub>1</sub> Strongly disagree   <sub>2</sub> Disagree   <sub>3</sub> Agree   <sub>4</sub> Strongly agree

**13- Using of telerehabilitation system can save time, and money.**

<sub>1</sub> Strongly disagree   <sub>2</sub> Disagree   <sub>3</sub> Agree   <sub>4</sub> Strongly agree

**14- Telerehabilitation system can save efforts.**

<sub>1</sub> Strongly disagree   <sub>2</sub> Disagree   <sub>3</sub> Agree   <sub>4</sub> Strongly agree

**15- The application of ICT in health care is not available in our hospital.**

<sub>1</sub> Strongly disagree   <sub>2</sub> Disagree   <sub>3</sub> Agree   <sub>4</sub> Strongly agree

#### **Section 4: Comfort with technology**

**16- I can trust the technology to work.**

<sub>1</sub> Strongly disagree   <sub>2</sub> Disagree   <sub>3</sub> Agree   <sub>4</sub> Strongly agree

**17- I am happy in using ICT/Internet for the purpose of patient care and education.**

<sub>1</sub> Strongly disagree   <sub>2</sub> Disagree   <sub>3</sub> Agree   <sub>4</sub> Strongly agree

**18- There is a general comfort using ICT/Internet for storing, retrieving, and communicating of patient information with other health institutions.**

<sub>1</sub> Strongly disagree   <sub>2</sub> Disagree   <sub>3</sub> Agree   <sub>4</sub> Strongly agree

**19- Our culture and social norms do not prohibit the use of telerehabilitation systems.**

<sub>1</sub> Strongly disagree   <sub>2</sub> Disagree   <sub>3</sub> Agree   <sub>4</sub> Strongly agree

#### **Section 5: Willingness about telerehabilitation**

**20- I would be happy to use telerehabilitation to obtain consultations from other hospitals.**

<sub>1</sub> Strongly disagree   <sub>2</sub> Disagree   <sub>3</sub> Agree   <sub>4</sub> Strongly agree

**21- I would be happy to use telerehabilitation to watch live physiotherapy sessions as they take place**

<sub>1</sub> Strongly disagree   <sub>2</sub> Disagree   <sub>3</sub> Agree   <sub>4</sub> Strongly agree

**22- Telerehabilitation is appropriate in my hospital, based on current conditions**

<sub>1</sub> Strongly disagree   <sub>2</sub> Disagree   <sub>3</sub> Agree   <sub>4</sub> Strongly agree

**23- My colleagues would be willing to use telerehabilitation.**

<sub>1</sub> Strongly disagree    <sub>2</sub> Disagree    <sub>3</sub> Agree    <sub>4</sub> Strongly agree

**24- I would be happy to use telerehabilitation to deliver physiotherapy**

<sub>1</sub> Strongly disagree    <sub>2</sub> Disagree    <sub>3</sub> Agree    <sub>4</sub> Strongly agree

**25- Which of the following barriers to the use of telerehabilitation systems?**

**(Tick all that apply)**

- High cost of equipment
- Negative attitudes of staff involved
- Lack of suitable training to practice telerehabilitation
- Perceived increase in workload
- Patient privacy and confidentiality of their data
- Lack of user-friendly software
- Lack of perceived clinical usefulness
- Lack of connection between ICT experts and clinicians
- Others, please specify.....

Thank you for your participating
